# Supplementary material
Source: PubMed Central journal article supplement (PMC5876131)
Supplement: NIHMS928639-supplement-Figure_S1-S2.pdf [file NIHMS928639-supplement-Figure_S1-S2.pdf]

Supporting Information for:  
General Phase Regularized Reconstruction using Phase Cycling

Frank Ong<sup>1</sup>, Joseph Cheng<sup>2</sup>, and Michael Lustig<sup>1</sup>

<sup>1</sup>Department of Electrical Engineering and Computer Sciences,  
University of California, Berkeley, California.

<sup>2</sup>Department of Radiology,  
Stanford University, Stanford, California.

September 15, 2017

*Running head:* General Phase Regularized Reconstruction using Phase Cycling

*Address correspondence to:*

Michael Lustig  
506 Cory Hall  
University of California, Berkeley  
Berkeley, CA 94720  
mlustig@eecs.berkeley.edu

This work was supported by NIH R01EB019241, NIH R01EB009690, GE Healthcare, and NSF Graduate Fellowship.

Submitted to *Magnetic Resonance in Medicine* as a Full Paper.

Part of this work has been presented at the ISMRM Annual Conference 2014 and 2017.

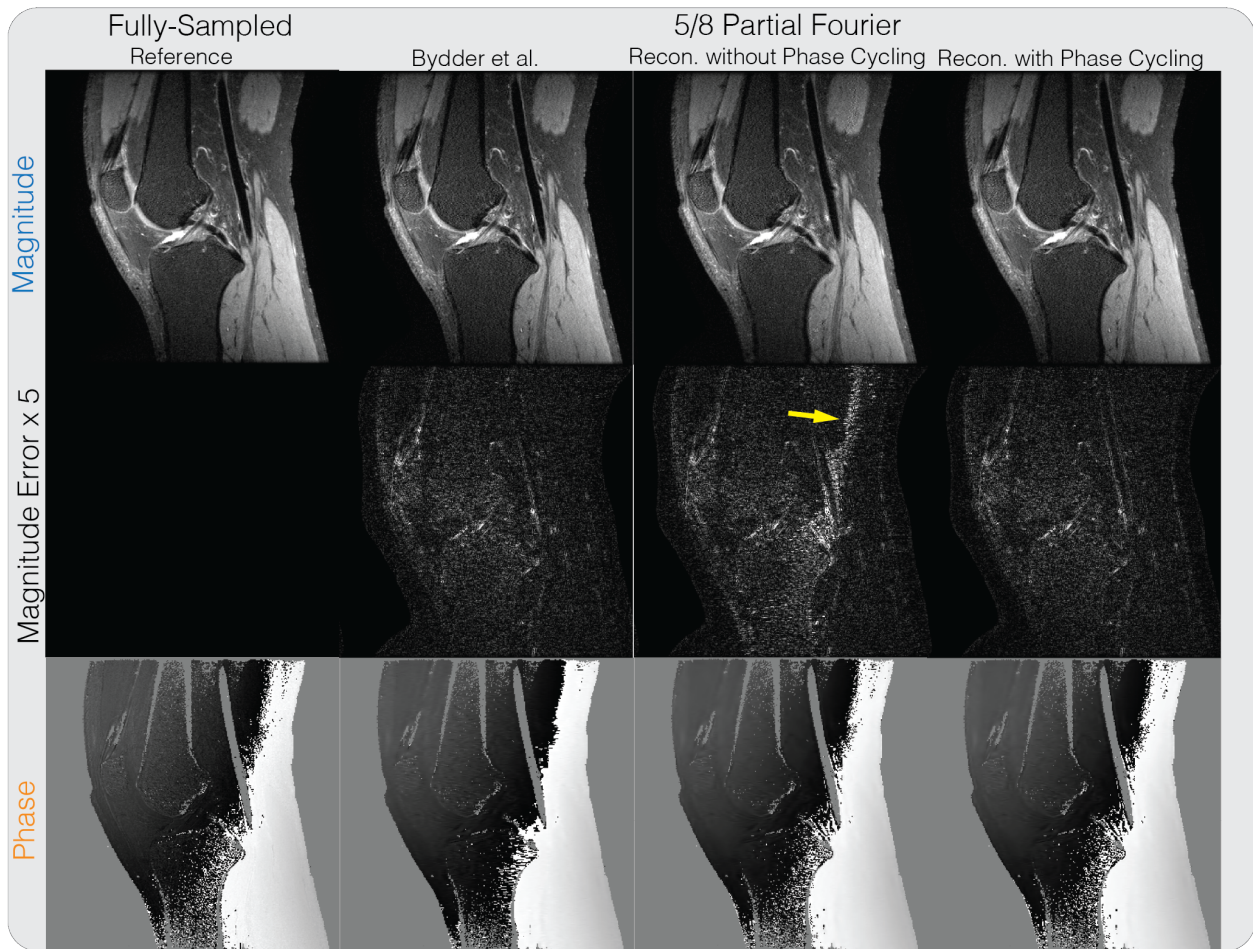

Supporting Figure S1: Partial Fourier + PI reconstruction results on a knee dataset. Without phase cycling, significant artifacts can be seen in the magnitude image near phase wraps in the initial solution, pointed by the yellow arrow. With phase cycling, these artifacts were reduced and the result is comparable to the robust iterative partial Fourier method with  $\ell_1$  wavelet described in Bydder et al.

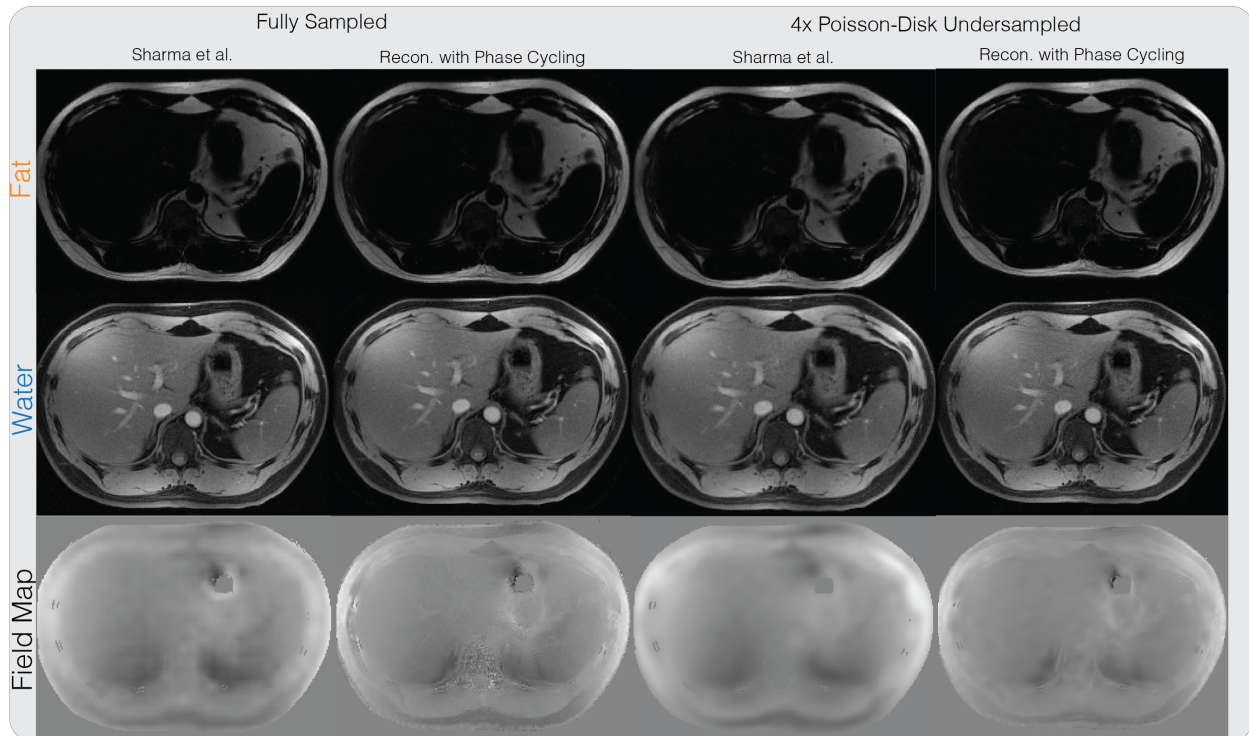

Supporting Figure S2: Water-fat + PI + CS reconstruction result on a liver dataset with three echoes. Both the method from Sharma et al. and our proposed method produce similar water and fat images on the fully-sampled dataset and the retrospectively under-sampled dataset.
